# Supplementary material for: A thermodynamically favorable route to the synthesis of nanoporous graphene templated on CaO via chemical vapor deposition
Source: Royal Society of Chemistry journal article supplement (doi:10.1039/d4gc00116h), 2024-01-01
Supplement: d4gc00116h1.pdf [file d4gc00116h1.pdf]

Electronic Supplementary Information (ESI)

**Thermodynamically Favorable Route to the Synthesis of Nanoporous Graphene  
Templated on CaO *via* Chemical Vapor Deposition**

Kritin Pirabul<sup>a,§</sup>, Qi Zhao<sup>b,§</sup>, Shogo Sunahiro<sup>c</sup>, Zheng-Ze Pan<sup>d,\*</sup>, Takeharu Yoshii<sup>a</sup>, Yuichiro Hayasaka,<sup>e</sup> Eddie Hoi-Sing Pang<sup>b</sup>, Rachel Crespo-Otero<sup>f</sup>, Devis Di Tommaso<sup>b,g,\*</sup>, Takashi Kyotani<sup>a</sup> and Hirotomo Nishihara<sup>a,d,\*</sup>

<sup>a</sup>Institute of Multidisciplinary Research for Advanced Materials, Tohoku University, 2-1-1 Katahira, Aoba-ku, Sendai, Miyagi, 980-8577, Japan.

<sup>b</sup>Department of Chemistry, Queen Mary University of London, Mile End Road, London E1 4NS, UK. E-mail: d.ditommaso@qmul.ac.uk

<sup>c</sup>R & D Strategy Division, Tokai Carbon Co., Ltd., Aoyama Building, 1-2-3 Kita Aoyama, Minato-ku, Tokyo 107-8636, Japan.

<sup>d</sup>Advanced Institute for Materials Research (WPI-AIMR), Tohoku University, 2-1-1 Katahira, Aoba-ku, Sendai, Miyagi, 980-8577, Japan. E-mail: zigzag.mpan@gmail.com, pan.zhengze.e6@tohoku.ac.jp, hirotomo.nishihara.b1@tohoku.ac.jp

<sup>e</sup>The Electron Microscopy Centre, Tohoku University, 2-1-1 Katahira, Aoba, Sendai, Miyagi 980-8577, Japan.

<sup>f</sup>Department of Chemistry, University College London, 2020 Gordon St., London, WC1H 0AJ, UK.

<sup>g</sup>Digital Environment Research Institute, Queen Mary University of London, Empire House, 67-75 New Road, London E1 1HH, UK.

<sup>§</sup> Equally contributed and regarded as co-first authors.

Corresponding authors e-mail: zigzag.mpan@gmail.com, pan.zhengze.e6@tohoku.ac.jp; d.ditommaso@qmul.ac.uk; hirotomo.nishihara.b1@tohoku.ac.jp

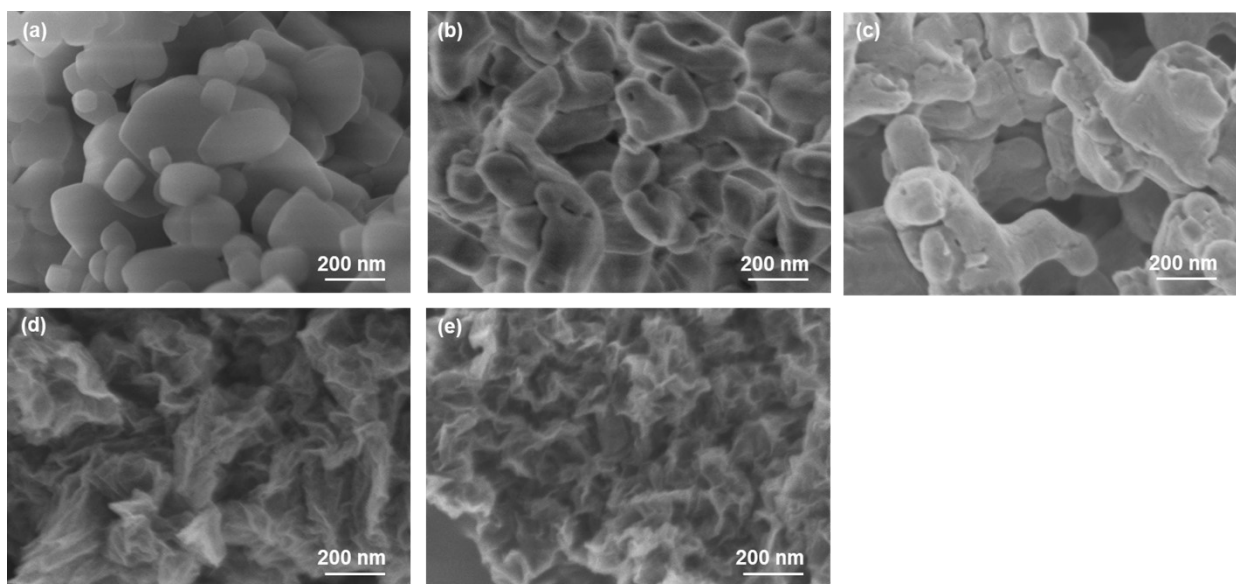

**Fig.S1** SEM images of (a) SK-I, (b) SK-I\_900, (c) C/SK-I, (d) TC\_SK-I, and (e) TC\_SK-I\_A

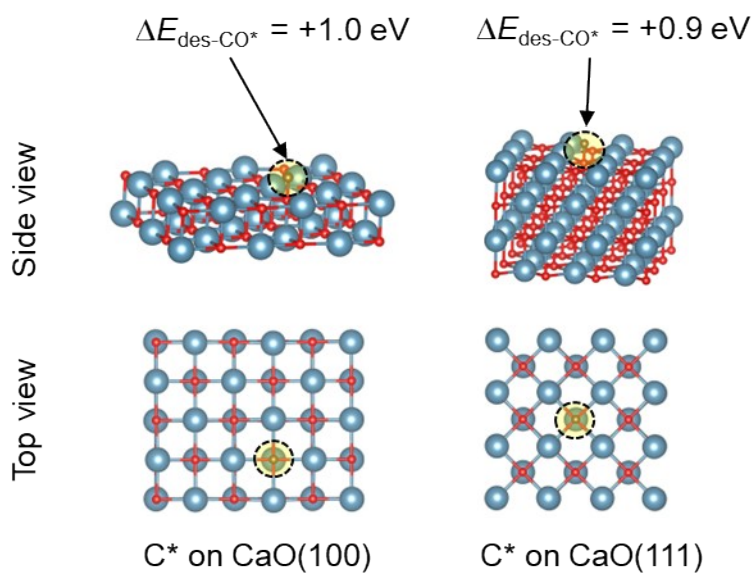

**Fig. S2** Side and top views of the optimized structural models of (left) C\* on CaO(100), , and (right) C\* on CaO(111) with the values of the CO desorption energy ( $\Delta E_{\text{des-CO}^*}$ ) from the labeled C\* on O sites. The blue, red, and brown balls represent Ca, O, C atoms, respectively.

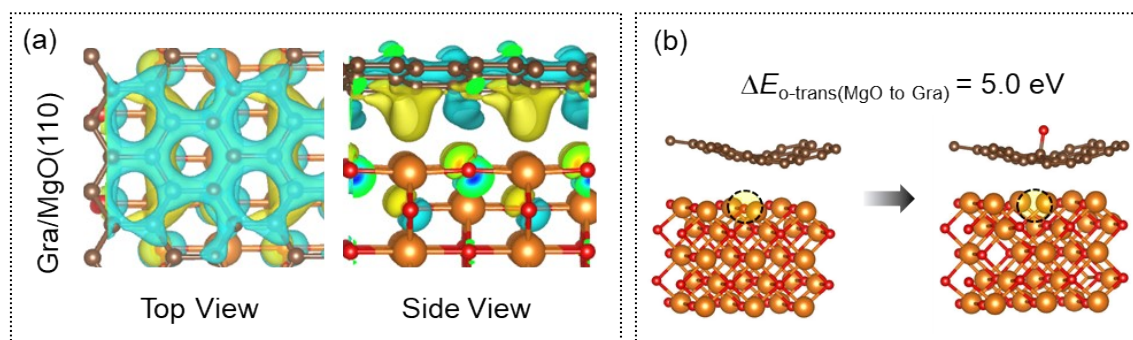

**Fig. S3** (a) Charge density mappings of graphene/MgO(110) (Gra/MgO(110)). (b) The optimized structural model of Gra/MgO(110) and O\* on Gra/MgO(110) with the energy required for transferring O from MgO to the surface graphene ( $\Delta E_{O\text{-trans(MgO to Gra)}}$ ). The red, orange, and brown balls represent O, Mg, and C atoms, respectively.

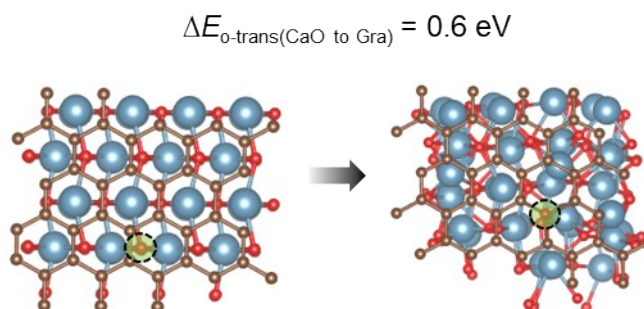

**Fig. S4** Top views of the optimized structural models of Gra/CaO(110) and O\* on Gra/CaO(110) with the energy required for transferring O from CaO to the surface graphene ( $\Delta E_{O\text{-trans(CaO to Gra)}}$ ). The green region locates the transferred O.

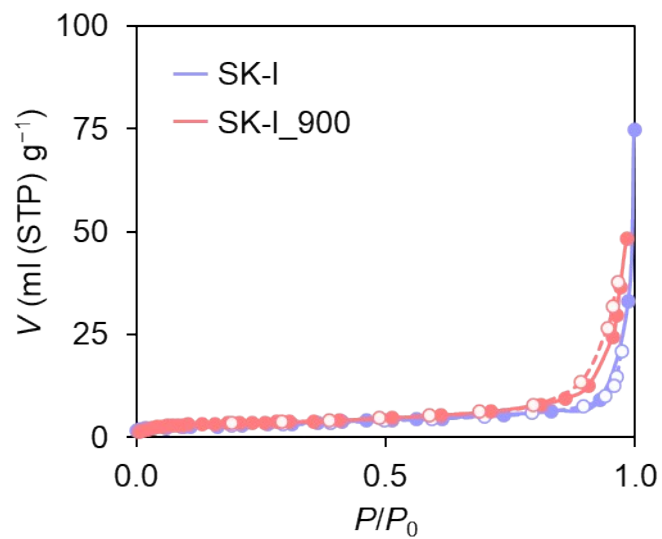

**Fig. S5**  $N_2$  adsorption/desorption isotherms at  $-196\text{ }^{\circ}\text{C}$  for SK-I and SK-I\_900.

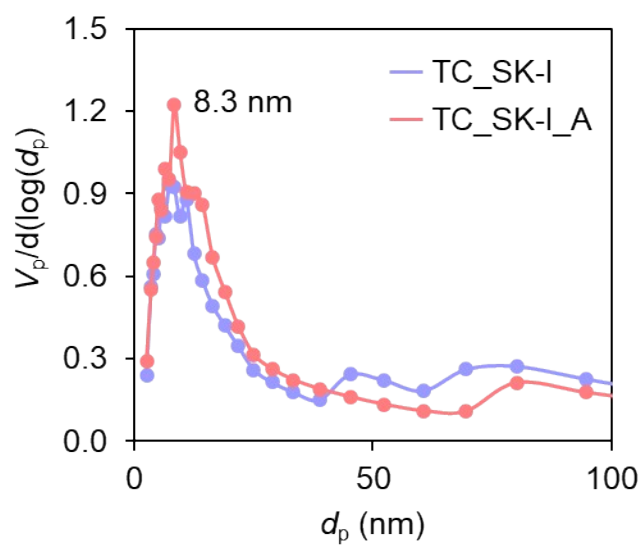

**Fig. S6** Pore-size distributions calculated by the BJH method for TC\_SK-I and TC\_SK-I\_A.

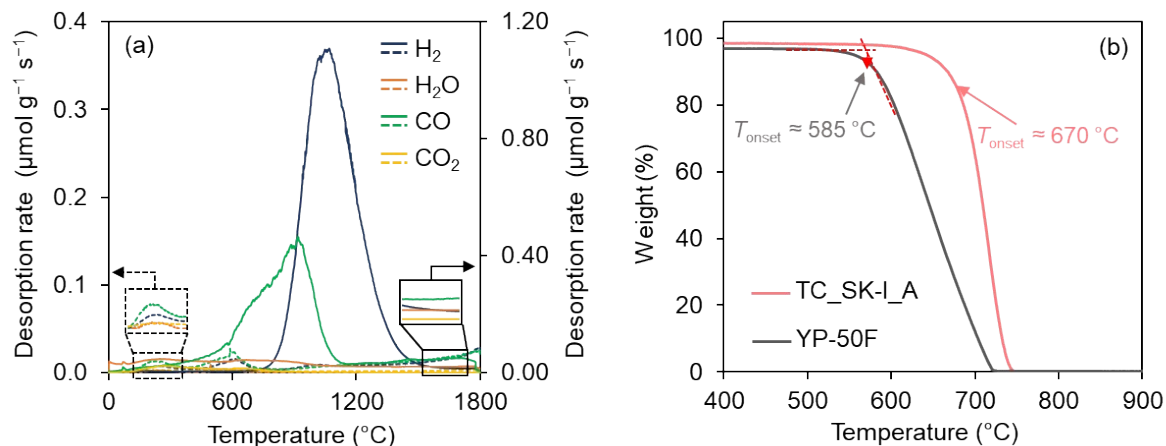

**Fig. S7** (a) Gas evolution patterns of YP-50F (solid lines) and TC\_SK-I\_A (dashed lines) during the high-sensitivity TPD measurement up to 1800  $^{\circ}\text{C}$ . (b) The oxidation resistance of YP-50F and TC\_SK-I\_A characterized by TG measurement in air. The heating rate is  $5^{\circ}\text{C min}^{-1}$ .

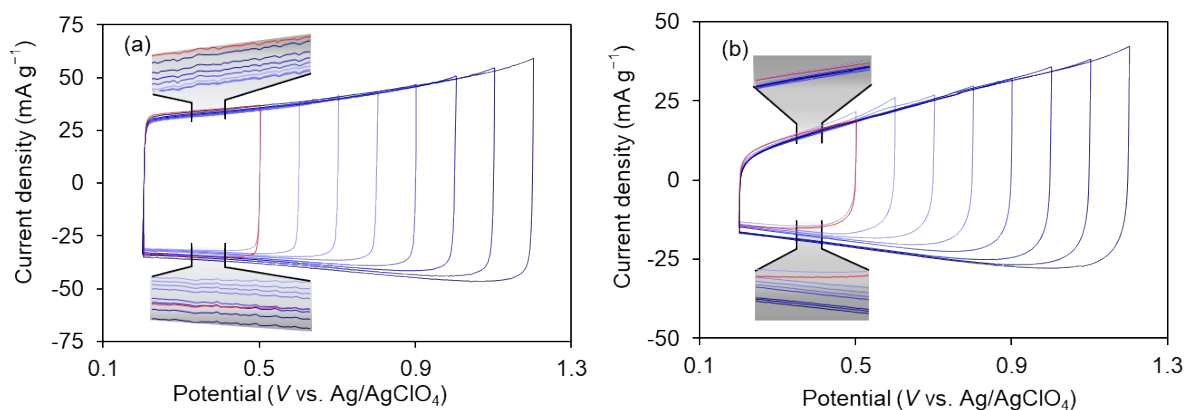

**Fig. S8** Cyclic voltammograms measured with a scan rate of  $1 \text{ mV s}^{-1}$  using (a) TC\_SK-I and (b) TC\_SK-I\_A. A three-electrode cell was used with  $1 \text{ M Et}_4\text{NBF}_4/\text{propylene carbonate}$  at  $25^{\circ}\text{C}$ . The blue lines represent the data during the upper limit potential inclining step in the range of 0.5-1.2 V. The red line is the data measured between 0.2 and 0.5 V following the CV performed from 0.2 to 1.2 V.

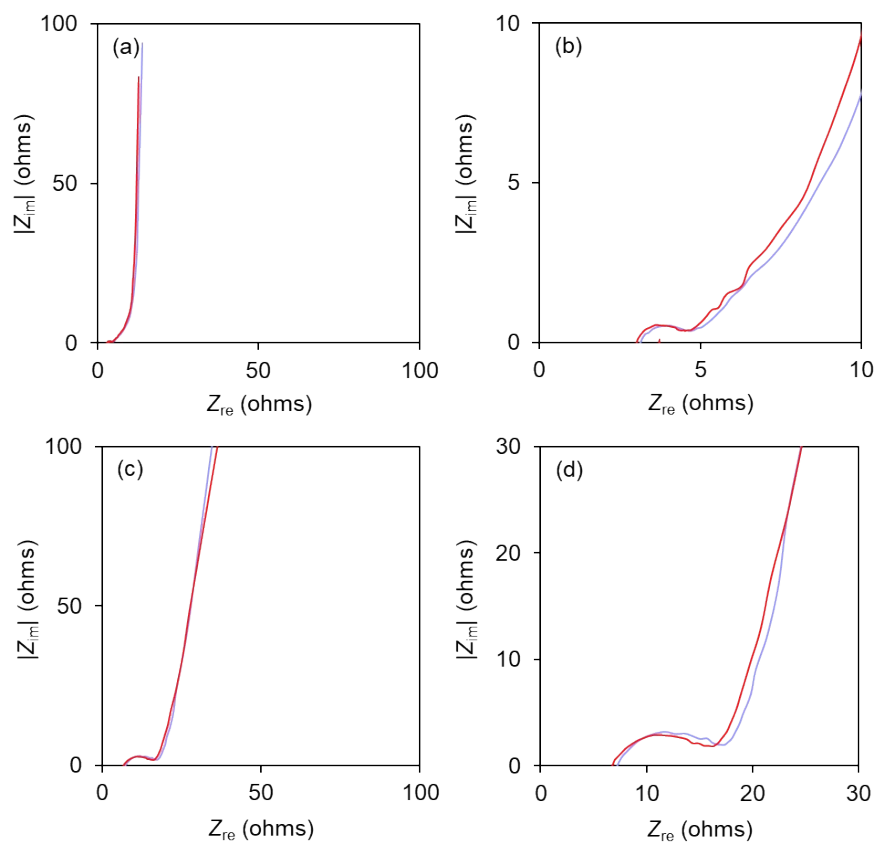

**Fig. S9** The Nyquist plots of TC\_SK-I and TC\_SK-I\_A measured by using a three-electrode cell in 1 M  $\text{Et}_4\text{NBF}_4$ /propylene carbonate at 25 °C. Nyquist plots at OCV (0.2 V) obtained throughout cyclic voltammetry (CV) measurement of (a,b) TC\_SK-I (c,d) TC\_SK-I\_A. The blue line represents the data before the CV measurement. The red line is data measured following the CV performed from 0.2 to 1.2 V.

**Table S1** Impurities contained in CaCO<sub>3</sub> analyzed by inductively coupled plasma atomic emission spectroscopy (ICP-AES). The data are kindly provided by Shiraishi Central Laboratories Co., Ltd.

| Sample | Impurity content (ppm) |     |     |     |     |      |
|--------|------------------------|-----|-----|-----|-----|------|
|        | Na                     | Mg  | Fe  | Sr  | Si  | Al   |
| SK-I   | 27.8                   | 4.2 | 3.5 | 3.5 | 6.9 | <0.1 |
